# Supplementary material
Source: PubMed Central journal article supplement (PMC2894660)
Supplement: supp_123_14_2481__1.pdf [file supp_123_14_2481__1.pdf]

Supplementary Table 1. Complementation by the GFP-tagged essential MOP components

| Plasmid            | Mutant        | Strain | % Sporulation |
|--------------------|---------------|--------|---------------|
| CEN-SPO21-GFP      | <i>spo21_</i> | AN180  | 57.8          |
| CEN-SPO21          | <i>spo21_</i> | AN180  | 53.5          |
| CEN-empty          | <i>spo21_</i> | AN180  | 0.0           |
| - no plasmid -     | <i>spo21_</i> | AN180  | 0.0           |
| 2 $\mu$ -SPO74-GFP | <i>spo74_</i> | MND58  | 63.0          |
| 2 $\mu$ -SPO74     | <i>spo74_</i> | MND58  | 68.0          |
| 2 $\mu$ -empty     | <i>spo74_</i> | MND58  | 0.0           |
| - no plasmid -     | <i>spo74_</i> | MND58  | 0.0           |
| 2 $\mu$ -MPC54-GFP | <i>mpc54_</i> | NY541  | 61.3          |
| 2 $\mu$ -MPC54     | <i>mpc54_</i> | NY541  | 43.8          |
| 2 $\mu$ -empty     | <i>mpc54_</i> | NY541  | 0.0           |
| - no plasmid -     | <i>mpc54_</i> | NY541  | 0.0           |

Cells were induced to sporulate. After two days, 200 cells were analyzed for sporulation in each condition. Numbers represent the averages of two experiments. Complementation of the MOP protein deletion strains is indicated by a rescue of sporulation.
