# Supplementary material
Source: PubMed Central journal article supplement (PMC2894660)
Supplement: supp_123_14_2481__2.pdf [file supp_123_14_2481__2.pdf]

Supplementary Table 2. Complementation by integrated *CNM67-GFP* and *SPC42-GFP*

| Genotype         | Strain | % Sporulation |
|------------------|--------|---------------|
| <i>SPC42</i>     | AN120  | 90.8          |
| <i>SPC42-GFP</i> | EMD85  | 84.8          |
| <i>CNM67</i>     | AN120  | 90.8          |
| <i>CNM67-GFP</i> | EMD6   | 85.0          |

Cells were induced to sporulate. After two days, 200 cells were analyzed for sporulation in each condition. Numbers represent the averages of two experiments. Complementation by the GFP-tagged proteins is indicated by maintaining the sporulation efficiency as compared to wild-type.
