# Supplementary material
Source: PubMed Central journal article supplement (PMC2894660)
Supplement: supp_123_14_2481__4.pdf [file supp_123_14_2481__4.pdf]

Table 4. Strains used in this study.

| Strain    | Genotype                                                                                                                                                                                                                                                                                                                                           | Source                   |
|-----------|----------------------------------------------------------------------------------------------------------------------------------------------------------------------------------------------------------------------------------------------------------------------------------------------------------------------------------------------------|--------------------------|
| AN117-4B  | <i>MAT<math>\alpha</math> arg4-NspI his3SK ho::LYS2 leu2 lys2 rme1::LEU2 trp1::hisG ura3</i>                                                                                                                                                                                                                                                       | (Neiman et al., 2000)    |
| AN117-16D | <i>MAT<math>\alpha</math> his3/SK ho::LYS2 leu2 lys2 trp1::hisG ura3</i>                                                                                                                                                                                                                                                                           | (Neiman et al., 2000)    |
| AN120     | <i>MAT<math>\alpha</math>/MAT<math>\alpha</math> ARG4/arg4-NspI his3SK/his3SK ho::LYS2/ho::LYS2 leu2/leu2<br/>lys2/lys2RME1/rme1::LEU2 trp1::hisG/trp1::hisG ura3/ura3</i>                                                                                                                                                                         | (Neiman et al., 2000)    |
| AN180     | <i>MAT<math>\alpha</math>/MAT<math>\Delta</math> ARG4/arg4-NspI his3<math>\Delta</math>SK/his3<math>\Delta</math>SK ho<math>\Delta</math>::LYS2/ho<math>\Delta</math>::LYS2 leu2/leu2<br/>lys2/lys2 spo21<math>\Delta</math>::HIS3MX6/spo21<math>\Delta</math>::HIS3MX6 RME1/rme1<math>\Delta</math>::LEU2<br/>trp1::hisG/trp1::hisG ura3/ura3</i> | (Neiman et al., 2000)    |
| HI3       | <i>MAT<math>\alpha</math>/MAT<math>\alpha</math> ARG4/arg4-NspI his3<math>\Delta</math>SK/his3<math>\Delta</math>SK ho<math>\Delta</math>::LYS2/ho<math>\Delta</math>::LYS2 leu2/leu2<br/>lys2/lys2 RME1/rme1<math>\Delta</math>::LEU2 trp1::hisG/trp1::hisG ura3/ura3 sso1<math>\Delta</math>::his5+/sso1<math>\Delta</math>::his5+</i>           | (Nakanishi et al., 2006) |
| HI60      | <i>MAT<math>\alpha</math>/MAT<math>\alpha</math> ARG4/arg4-NspI his3<math>\Delta</math>SK/his3<math>\Delta</math>SK ho<math>\Delta</math>::LYS2/ho<math>\Delta</math>::LYS2 leu2/leu2<br/>lys2/lys2 RME1/rme1<math>\Delta</math>::LEU2 trp1::hisG/trp1::hisG ura3/ura3 spo14<math>\Delta</math>::ura3-/spo14<math>\Delta</math>::ura3-</i>         | This study               |
| EMD85     | <i>MAT<math>\alpha</math>/MAT<math>\alpha</math> ARG4/arg4-NspI his3<math>\Delta</math>SK/his3<math>\Delta</math>SK ho<math>\Delta</math>::LYS2/ho<math>\Delta</math>::LYS2 leu2/leu2<br/>lys2/lys2 RME1/rme1<math>\Delta</math>::LEU2 trp1::hisG/trp1::hisG ura3/ura3<br/>SPC42-GFP::kanMX4/SPC42-GFP::kanMX4</i>                                 | This study               |
| EMD3      | <i>MAT<math>\alpha</math>/MAT<math>\alpha</math> ARG4/arg4-NspI his3<math>\Delta</math>SK/his3<math>\Delta</math>SK ho<math>\Delta</math>::LYS2/ho<math>\Delta</math>::LYS2 leu2/leu2</i>                                                                                                                                                          | This study               |

*lys2/lys2 RME1/rme1Δ::LEU2 trp1::hisG/trp1::hisG ura3/ura3 sso1Δ::his5+/sso1Δ::his5+*  
*SPC42-GFP::kanMX4/SPC42-GFP::kanMX4*

|       |                                                                                                                                                                                                                                   |                       |
|-------|-----------------------------------------------------------------------------------------------------------------------------------------------------------------------------------------------------------------------------------|-----------------------|
| EMD4  | <i>MATa/MATα ARG4/arg4-NspI his3ΔSK/his3ΔSK hoΔ::LYS2/hoΔ::LYS2 leu2/leu2</i><br><i>lys2/lys2 RME1/rme1Δ::LEU2 trp1::hisG/trp1::hisG ura3/ura3</i><br><i>CNM67-GFP::his5+/CNM67-GFP::his5+</i>                                    | This study            |
| EMD6  | <i>MATa/MATα ARG4/arg4-NspI his3ΔSK/his3ΔSK hoΔ::LYS2/hoΔ::LYS2 leu2/leu2</i><br><i>lys2/lys2 RME1/rme1Δ::LEU2 trp1::hisG/trp1::hisG ura3/ura3 sso1Δ::his5+/sso1Δ::his5+</i><br><i>CNM67-GFP::his5+/CNM67-GFP::his5+</i>          | This study            |
| MND57 | <i>MATa/MAT ARG4/arg4-NspI his3SK/his3SK ho::LYS2/ho::LYS2 leu2/leu2 lys2/lys2</i><br><i>RME1/rme1::LEU2 trp1::hisG/trp1::hisG ura3/ura3 ady4Δ::HIS3MX6/ady4Δ::HIS3MX6</i>                                                        | (Nickas et al., 2003) |
| MND46 | <i>MATa/MATα ARG4/arg4-NspI his3ΔSK/his3ΔSK hoΔ::LYS2/hoΔ::LYS2 leu2/leu2</i><br><i>lys2/lys2 RME1/rme1Δ::LEU2 trp1::hisG/trp1::hisG ura3/ura3</i><br><i>ady4Δ::HIS3MX6/ady4Δ::HIS3MX6 MPC54-GFP::HIS3MX6/ MPC54-GFP::HIS3MX6</i> | This study            |
| MND48 | <i>MATa/MATα ARG4/arg4-NspI his3ΔSK/his3ΔSK hoΔ::LYS2/hoΔ::LYS2 leu2/leu2</i><br><i>lys2/lys2 RME1/rme1Δ::LEU2 trp1::hisG/trp1::hisG ura3/ura3</i><br><i>ady4Δ::HIS3MX6/ady4Δ::HIS3MX6 SPO21-GFP::HIS3MX6/ SPO21-GFP::HIS3MX6</i> | This study            |

|       |                                                                                                                                                                                                                                                                                                                                                                                                                            |                       |
|-------|----------------------------------------------------------------------------------------------------------------------------------------------------------------------------------------------------------------------------------------------------------------------------------------------------------------------------------------------------------------------------------------------------------------------------|-----------------------|
| EMD10 | <i>MAT<math>\alpha</math>/MAT<math>\alpha</math> ARG4/arg4-NspI his3<math>\Delta</math>SK/his3<math>\Delta</math>SK ho<math>\Delta</math>::LYS2/ho<math>\Delta</math>::LYS2 leu2/leu2</i><br><i>lys2/lys2 RME1/rme1<math>\Delta</math>::LEU2 trp1::hisG/trp1::hisG ura3/ura3 sso1<math>\Delta</math>::his5+/sso1<math>\Delta</math>::his5+</i><br><i>ady4<math>\Delta</math>::HIS3MX6/ady4<math>\Delta</math>::HIS3MX6</i> | This study            |
| MND58 | <i>MAT<math>\alpha</math>/MAT ARG4/arg4-NspI his3SK/his3SK ho::LYS2/ho::LYS2 leu2/leu2 lys2/lys2</i><br><i>RME1/rme1::LEU2 trp1::hisG/trp1::hisG ura3/ura3 spo74<math>\Delta</math>::HIS3MX6/spo74<math>\Delta</math>::HIS3MX6</i>                                                                                                                                                                                         | (Nickas et al., 2003) |
| NY541 | <i>MAT<math>\alpha</math>/MAT ARG4/arg4-NspI his3SK/his3SK ho::LYS2/ho::LYS2 leu2/leu2 lys2/lys2</i><br><i>RME1/rme1::LEU2 trp1::hisG/trp1::hisG ura3/ura3 mpc54<math>\Delta</math>::HIS3MX6/mpc54<math>\Delta</math>::HIS3MX6</i>                                                                                                                                                                                         | (Nickas et al., 2003) |
