# Supplementary material
Source: PubMed Central journal article supplement (PMC2894660)
Supplement: supp_123_14_2481__5.pdf [file supp_123_14_2481__5.pdf]

Table 7. Plasmids used in this study.

| Plasmid                        | Relevant features                                      | Source                      |
|--------------------------------|--------------------------------------------------------|-----------------------------|
| 314-SPO21-GFP                  | CEN <i>SPO21-GFP</i>                                   | This study                  |
| 424-MPC54-GFP                  | 2 $\mu$ <i>MPC54-GFP</i>                               | (Nickas et al., 2003)       |
| 424-SPO74-GFP                  | 2 $\mu$ <i>SPO74-GFP</i>                               | (Nickas et al., 2003)       |
| 426-RFP-SPO20 <sup>51-91</sup> | 2 $\mu$ P <sub>TEF2</sub> -Spo20 <sup>51-91</sup> -RFP | (Diamond et al., 2009)      |
| pSSEC7-EGFPx3                  | <i>SEC73</i> ' end- <i>EGFPx3</i>                      | (Rossanese and Glick, 2001) |
| 426-ADY4-DTR1-RFP              | 2 $\mu$ <i>ADY4 DTR1-RFP</i>                           | This study                  |
| 424-ADY4-GFP                   | 2 $\mu$ <i>ADY4-GFP</i>                                | (Nickas et al., 2003)       |
| 426-TEF-mRFP                   | 2 $\mu$ P <sub>TEF2</sub> -mRFP                        | This study                  |
| 316-SPO21                      | CEN <i>SPO21</i>                                       | (Bajgier et al., 2001)      |
| 424-SPO74                      | 2 $\mu$ <i>SPO74</i>                                   | (Nickas et al, 2004)        |
| 426-MPC54                      | 2 $\mu$ <i>MPC54</i>                                   | This study                  |
| 424                            | 2 $\mu$ empty                                          | (Sikorski and Hieter, 1989) |
| 314                            | CEN empty                                              | (Sikorski and Hieter, 1989) |
